# Supplementary material for: Factors Influencing Retention of Transgender and Gender Nonconforming Students in Undergraduate STEM Majors
Source: Atypon-hosted journal article supplement (doi:10.1187/cbe.21-05-0136), 2022-01-19
Supplement: combinedsupmats.pdf [file combinedsupmats.pdf]

# Supplemental Material

*CBE—Life Sciences Education*

Maloy *et al.*

## Supplementary Materials for

Factors influencing retention of transgender and gender nonconforming students in  
undergraduate STEM majors

Jeffrey Maloy, Monika Kwapisz, Bryce Hughes

Correspondence to: [jmaloy@g.ucla.edu](mailto:jmaloy@g.ucla.edu)

### **This PDF file includes:**

Tables S1 to S3

Full HGLM equation

Full logistic regression equation

List S1

**Table S1.**List of STEM majors.

---

*Life Sciences*

Biology (general)  
Biochemistry or biophysics  
Botany  
Environmental science  
Marine (life) science  
Microbiology or bacteriology  
Zoology  
Other biological science

*Engineering*

Aeronautical or astronautical engineering  
Civil engineering  
Chemical engineering  
Computer engineering  
Electrical or electronic engineering  
Industrial engineering  
Mechanical engineering  
Other engineering

*Physical sciences and mathematics*

Astronomy  
Atmospheric science (incl. meteorology)  
Chemistry  
Computer science  
Earth science  
Marine science (incl. oceanography)  
Mathematics  
Physics  
Other physical science

*Health-related fields*

Health technology (medical, dental, laboratory)  
Nursing  
Pharmacy

*Agriculture*

Agriculture

---

**Table S2.**

List of all variables included in analysis

| <i>Variable</i>                                                          | <i>Coding</i>                                                                    |
|--------------------------------------------------------------------------|----------------------------------------------------------------------------------|
| <i>Student background characteristics</i>                                |                                                                                  |
| TGNC                                                                     | 0 Non-TGNC<br>1 TGNC                                                             |
| LGBQ+                                                                    | 0 Non-LGBQ+<br>1 LGBQ+                                                           |
| URM                                                                      | 0 Non-URM<br>1 URM                                                               |
| First generation status based on parent(s) with less than 'some college' | 0 Non-First-<br>1 First-Generation                                               |
| <i>Academic self-confidence</i>                                          |                                                                                  |
| Self rating: Academic ability                                            |                                                                                  |
| Self rating: Mathematical ability                                        |                                                                                  |
| Self rating: Computer skills                                             | 1 Lowest 10%<br>2 Below average<br>3 Average<br>4 Above average<br>5 Highest 10% |
| <i>Pre-college academic preparation</i>                                  |                                                                                  |
| What was your average grade in high school?                              | 1 D<br>2 C<br>3 C+                                                               |

- 4 B-
- 5 B
- 6 B+
- 7 A-
- 8 A or A+

SAT math score

*College experiences*

Felt depressed

Sought personal counseling

Studied with other students

Felt that your contributions were valued in class

Demonstrated for a cause

Looked up scientific research articles and resources

Faculty provided an opportunity to work on a research project

Demonstrated for a cause

- 1 Not at all
  - 2 Occasionally
  - 3 Frequently
-

**Table S3.** Descriptive statistics for all variables included in analysis

| <i>Variable</i>                                               | Cisgender   |           | TGNC        |           | Min | Max |
|---------------------------------------------------------------|-------------|-----------|-------------|-----------|-----|-----|
|                                                               | <i>Mean</i> | <i>SD</i> | <i>Mean</i> | <i>SD</i> |     |     |
| LGBQ+                                                         | 0.09        | 0.28      | 0.81        | 0.39      | 0   | 1   |
| URM                                                           | 0.16        | 0.37      | 0.21        | 0.41      | 0   | 1   |
| Self rating: Academic ability                                 | 4.19        | 0.68      | 4.12        | 0.64      | 1   | 5   |
| Self rating: Mathematical ability                             | 3.74        | 0.93      | 3.51        | 1.00      | 1   | 5   |
| Self rating: Computer skills                                  | 3.25        | 0.81      | 3.25        | 0.83      | 1   | 5   |
| What was your average grade in high school?                   | 7.13        | 1.03      | 7.03        | 1.11      | 1   | 8   |
| SAT math score                                                | 642         | 98        | 624         | 126       | 200 | 800 |
| Felt depressed                                                | 1.79        | 0.688     | 2.39        | 0.74      | 1   | 3   |
| Sought personal counseling                                    | 1.42        | 0.67      | 1.95        | 0.81      | 1   | 3   |
| Studied with other students                                   | 2.41        | 0.59      | 2.32        | 0.62      | 1   | 3   |
| Felt that your contributions were valued in class             | 2.34        | 0.60      | 2.25        | 0.70      | 1   | 3   |
| Demonstrated for a cause                                      | 1.30        | 0.54      | 1.81        | 0.66      | 1   | 3   |
| Looked up scientific research articles and                    | 2.59        | 0.60      | 2.58        | 0.59      | 1   | 3   |
| Faculty provided an opportunity to work on a research project | 2.05        | 0.74      | 1.98        | 0.73      | 1   | 3   |

**HGLM for full sample:**

$$\ln\left(\frac{\varphi_{ij}}{1 - \varphi_{ij}}\right) = \beta_{0j} + \beta_{1j} * TGNC_{ij} + \beta_{2j} * URM_{ij} + \beta_{3j} * HSGPA_{ij} + \beta_{4j} * FIRSTGEN_{ij} \\ + \beta_{5j} * RESEARCH_{ij} + \beta_{6j} * STUDY_{ij} + \beta_{7j} * ARTICLE_{ij} + \beta_{8j} * VALUED_{ij} \\ + \beta_{9j} * ACADABILITY_{ij} + \beta_{10j} * COUNSELING_{ij} + \beta_{11j} * DEPRESSED_{ij} \\ + \beta_{12j} * BELONGING_{ij} + \beta_{13j} * DEMONSTRATED_{ij} \\ \beta_{0j} = \gamma_{00} + u_{0j} \\ \beta_{1j} = \gamma_{11} \\ \vdots \\ \beta_{13j} = \gamma_{13,13}$$

The first equation is the level 1 equation, or the student-level equation, and the other equations are the level 2 equations for each level-1 coefficient in the model, where:

- $\phi_{ij}$  is the probability that STEMPERSIST = 1 for the  $i^{th}$  student at the  $j^{th}$  institution
- $\beta$ s are the level 1 coefficients
- $\beta_{0j}$  is the intercept for the  $j^{th}$  institution
- $\gamma$ s are the level 2 coefficients
- $\gamma_{00}$  is the overall intercept
- $u_{0j}$  is the level 2 error term

**Logistic regression model for TGNC sample:**

$$\ln\frac{\hat{p}}{1 - \hat{p}} = b_0 + b_1 * URM_i + b_2 * HSGPA_i + b_3 * FIRSTGEN_i + b_4 * RESEARCH_i + b_5 \\ * STUDY_i + b_6 * ARTICLE_i + b_7 * VALUED_i + b_8 * ACADABILITY_i + b_9 \\ * COUNSELING_i + b_{10} * DEPRESSED_i + b_{11} * BELONGING_i + b_{12} \\ * DEMONSTRATED_i + e_i$$

In this equation:

- $\hat{p}$  is the probability that STEMPERSIST = 1
- $\ln\frac{\hat{p}}{1 - \hat{p}}$  is the logit link function for the model
- $b_0$  is the model intercept
- $b$ s are the values of the slopes for each independent variable
- $e_i$  is the measurement error for case  $i$
- Standard errors are clustered by institution to account for nonindependence

## **List S1.**

### ***Data collection***

1. Ask study participants about gender with two items:
  - a. What is your current gender identity? (e.g., man, woman, nonbinary, genderqueer, other)
  - b. Do you identify as transgender?
2. Consider providing open-ended items that allow people to name gender identities (researchers should be prepared for the possibility of receiving hostile or resistant responses as well).
  - a. To avoid retraumatizing TGNC researchers, when possible non-TGNC peers should filter out hostile responses

### ***Mental Health***

1. Include information on course syllabus or day 1 presentation regarding mental health policies in the course.
  - a. E.g., “I recognize that mental illness is a valid sickness just like any physical illness you might encounter. Just as our course absence policy allows for you to miss class days if you are physically ill, you are also not expected to attend class on days that might require you to focus on your mental health. If you need to take time off for your mental health, you may simply inform me that you will be out sick, and you will not be penalized.”
2. Familiarize yourself with campus resources regarding mental health and resilience
  - a. Include these resources on course syllabi
  - b. Refer students appropriately

### ***Understand TGNC experiences***

1. Engage in qualitative work that describes the experiences of TGNC students in their own words
2. Provide multiple anonymous opportunities for students to provide constructive feedback regarding the climate of the course.
